# Supplementary material for: Seasonal Trophic Ecology and Diet Shift in the Common Sole Solea solea in the Central Adriatic Sea
Source: MDPI journal article supplement (doi:10.3390/ani12233369), 2022-11-30
Supplement: s1 [file s1]

# Seasonal Trophic Ecology and Diet Shift in the Common Sole *Solea solea* in the Central Adriatic Sea

Emanuela Fanelli <sup>1,2,\*</sup>, Elena Principato <sup>1</sup>, Eleonora Monfardini <sup>1</sup>, Zaira Da Ros <sup>1,\*</sup>, Giuseppe Scarcella <sup>3</sup>, Alberto Santojanni <sup>3</sup> and Sabrina Colella <sup>3</sup>

<sup>1</sup> Department of Life and Environmental Sciences, Polytechnic University of Marche, Via Brecce Bianche, 60131 Ancona, Italy

<sup>2</sup> Stazione Zoologica di Napoli Anton Dohrn, Villa Comunale, 80100 Naples, Italy

<sup>3</sup> National Research Council-Institute of Marine Biological Resources and Biotechnologies (CNR-IRBIM), Largo Fiera della Pesca 2, 60125 Ancona, Italy

\* Correspondence: e.fanelli@univpm.it (E.F.); z.daros@pm.univpm.it (Z.D.R.)

**Supplementary Table S1.** Values of %GSI, %HSI, stomach fullness (%),  $\delta^{15}\text{N}$  (‰),  $\delta^{13}\text{C}$  (‰), N%, C% and C/N measured seasonally in n=68 specimens of *Solea solea* captured in the Central Adriatic Sea between January and December 2019 for studying their diets.

| Season | Size |      | %GSI | %HSI | Stomach fullness (%) | $\delta^{15}\text{N}$ (‰) | $\delta^{13}\text{C}$ (‰) | N%    | C%    | C/N  |
|--------|------|------|------|------|----------------------|---------------------------|---------------------------|-------|-------|------|
| Spring | M    | mean | 0.39 | 0.86 | 0.12                 | 11.3                      | -18.4                     | 19.41 | 45.87 | 2.39 |
|        |      | s.d. | 0.24 | 0.23 |                      | 0.8                       | 0.5                       | 2.77  | 2.09  | 0.25 |
|        | L    | mean | 0.71 | 1.23 | 0.17                 | 11.2                      | -17.3                     | 19.93 | 44.29 | 2.24 |
|        |      | s.d. | 0.15 | 0.06 |                      | 0.2                       | 0.5                       | 1.93  | 1.93  | 0.28 |
| Summer | M    | mean | 0.38 | 0.85 | 0.14                 | 11.0                      | -17.7                     | 20.57 | 45.67 | 2.23 |
|        |      | s.d. | 0.31 | 0.23 |                      | 0.6                       | 0.5                       | 1.64  | 1.14  | 0.15 |
|        | L    | mean | 0.72 | 1.30 | 0.29                 | 11.4                      | -17.4                     | 20.49 | 45.21 | 2.22 |
|        |      | s.d. | 0.37 | 0.44 |                      | 0.6                       | 0.5                       | 1.62  | 2.45  | 0.16 |
| Autumn | M    | mean | 0.54 | 0.93 | 0.19                 | 11.2                      | -17.8                     | 20.76 | 46.02 | 2.23 |
|        |      | s.d. | 0.55 | 0.20 |                      | 0.6                       | 0.4                       | 4.23  | 8.33  | 0.18 |
|        | L    | mean | 1.41 | 1.24 | 0.16                 | 11.4                      | -17.4                     | 23.82 | 52.52 | 2.23 |
|        |      | s.d. | 1.06 | 0.32 |                      | 0.3                       | 0.2                       | 6.76  | 13.11 | 0.25 |
| Winter | M    | mean | 2.69 | 1.21 | 0.25                 | 11.9                      | -17.7                     | 21.28 | 46.68 | 2.20 |
|        |      | s.d. | 3.57 | 0.50 |                      | 0.5                       | 0.5                       | 1.74  | 1.84  | 0.15 |
|        | L    | mean | 5.29 | 1.52 | 0.25                 | 12.0                      | -17.7                     | 21.74 | 45.78 | 2.12 |
|        |      | s.d. | 3.12 | 0.47 |                      | 0.6                       | 0.8                       | 2.28  | 1.57  | 0.19 |

**Supplementary Table S2.** Results of univariate PERMANOVA main and pairwise tests carried out for the factors “Season” and “Size” on the %GSI, %HSI and stomach fullness values measured in n=477 specimens of *S. solea* captured between January and December 2019 in the Central Adriatic Sea for studying their diets. Pairwise comparisons are conducted on the interaction term “Season×Size” for pairs of level of factor “Season”. Only comparisons between pairs of consecutive seasons are showed. Level ‘M’ of factor ‘Size’= medium size; Level ‘L’ of factor ‘Size’=large size; df=degrees of freedom; MS= mean square; Pseudo-F= statistic F; t=statistic t for pairwise comparisons; Unique perms= number of permutations; p(MC)= probability level after Monte Carlo test; \*= $p \leq 0.05$ ; \*\*= $p \leq 0.01$ ; \*\*\*= $p \leq 0.001$ ; n.s. = not significant.

| %GSI               |     |       |          |       |                                                                              |      |              |       |
|--------------------|-----|-------|----------|-------|------------------------------------------------------------------------------|------|--------------|-------|
| Main test for %GSI |     |       |          |       | Pair-wise comparison for factor "Sea×Size" within level 'M' of factor 'Size' |      |              |       |
| Source             | df  | MS    | Pseudo-F | P(MC) | Groups                                                                       | t    | Unique perms | p(MC) |
| Season             | 3   | 37.83 | 11.47    | ***   | Spring vs summer                                                             | 0.63 | 9825         | n.s.  |
| Size               | 1   | 28.59 | 8.67     | **    | Summer vs autumn                                                             | 1.52 | 9943         | n.s.  |
| Sea×Size           | 3   | 6.86  | 2.08     | n.s.  | Autumn vs winter                                                             | 1.77 | 9830         | n.s.  |
| Residuals          | 303 | 3.30  |          |       | Winter vs spring                                                             | 3.24 | 9831         | **    |
| Total              | 310 |       |          |       | Pair-wise comparison for factor "Sea×Size" within level 'L' of factor 'Size' |      |              |       |
|                    |     |       |          |       | Groups                                                                       | t    | Unique perms | p(MC) |
|                    |     |       |          |       | Spring vs summer                                                             | 0.08 | 9876         | n.s.  |
|                    |     |       |          |       | Summer vs autumn                                                             | 3.50 | 9834         | ***   |
|                    |     |       |          |       | Autumn vs winter                                                             | 0.00 | 9836         | n.s.  |
|                    |     |       |          |       | Winter vs spring                                                             | 3.31 | 9840         | **    |
| %HSI               |     |       |          |       |                                                                              |      |              |       |
| Main test for %HSI |     |       |          |       | Pair-wise comparison for factor "Sea×Size" within level 'M' of factor 'Size' |      |              |       |
| Source             | df  | MS    | Pseudo-F | P(MC) | Groups                                                                       | t    | Unique perms | p(MC) |
| Season             | 3   | 0.88  | 3.29     | *     | Spring vs summer                                                             | 3.95 | 9838         | ***   |
| Size               | 1   | 4.19  | 16.60    | ***   | Summer vs autumn                                                             | 0.03 | 9832         | n.s.  |
| Sea×Size           | 3   | 1.38  | 1.81     | n.s.  | Autumn vs winter                                                             | 3.94 | 9827         | ***   |
| Residuals          | 304 | 76.80 |          |       | Winter vs spring                                                             | 1.66 | 9831         | n.s.  |
| Total              | 311 | 84.49 |          |       | Pair-wise comparison for factor "Sea×Size" within level 'L' of factor 'Size' |      |              |       |
|                    |     |       |          |       | Groups                                                                       | t    | Unique perms | p(MC) |
|                    |     |       |          |       | Spring vs summer                                                             | 0.64 | 9844         | n.s.  |

|                                |           |           |                 |              |                                                                              |          |                     |              |
|--------------------------------|-----------|-----------|-----------------|--------------|------------------------------------------------------------------------------|----------|---------------------|--------------|
|                                |           |           |                 |              | Summer vs autumn                                                             | 1.68     | 9840                | n.s.         |
|                                |           |           |                 |              | Autumn vs winter                                                             | 0.13     | 9926                | n.s.         |
|                                |           |           |                 |              | Winter vs spring                                                             | 0.78     | 9916                | n.s.         |
| <b>Stomach fullness</b>        |           |           |                 |              |                                                                              |          |                     |              |
| Main test for stomach fullness |           |           |                 |              | Pair-wise comparison for factor "Sea×Size" within level 'M' of factor 'Size' |          |                     |              |
| <b>Source</b>                  | <b>df</b> | <b>MS</b> | <b>Pseudo-F</b> | <b>P(MC)</b> | <b>Groups</b>                                                                | <b>t</b> | <b>Unique perms</b> | <b>p(MC)</b> |
| Season                         | 3         | 0.13      | 0.58            | n.s.         | Spring vs summer                                                             | 1.30     | 9841                | n.s.         |
| Size                           | 1         | 0.01      | 0.41            | n.s.         | Summer vs autumn                                                             | 1.47     | 9827                | n.s.         |
| Sea×Size                       | 3         | 0.22      | 0.96            | n.s.         | Autumn vs winter                                                             | 0.15     | 9883                | n.s.         |
| Residuals                      | 302       | 0.23      |                 |              | Winter vs spring                                                             | 1.93     | 9894                | n.s.         |
| Total                          | 309       |           |                 |              | Pair-wise comparison for factor "Sea×Size" within level 'L' of factor 'Size' |          |                     |              |
|                                |           |           |                 |              | <b>Groups</b>                                                                | <b>t</b> | <b>Unique perms</b> | <b>p(MC)</b> |
|                                |           |           |                 |              | Spring vs summer                                                             | 0.21     | 9840                | n.s.         |
|                                |           |           |                 |              | Summer vs autumn                                                             | 3.05     | 9837                | **           |
|                                |           |           |                 |              | Autumn vs winter                                                             | 1.16     | 9950                | n.s.         |
|                                |           |           |                 |              | Winter vs spring                                                             | 0.14     | 9933                | n.s.         |

**Supplementary Table S3.** Results of univariate PERMANOVA main and pairwise tests for the factors “Season” and “Size” carried out on the stomach fullness of female and male specimens of *Solea solea* captured between January and December 2019 in the Central Adriatic Sea for studying their diets. df=degrees of freedom; MS= mean square; Pseudo-F= statistic F; p(MC)= probability level after Monte Carlo test; n.s. = not significant.

| Stomach fullness                          |     |      |          |       |                                         |     |      |          |       |
|-------------------------------------------|-----|------|----------|-------|-----------------------------------------|-----|------|----------|-------|
| Main test for stomach fullness of FEMALES |     |      |          |       | Main test for stomach fullness of MALES |     |      |          |       |
| Source                                    | df  | MS   | Pseudo-F | P(MC) | Source                                  | df  | MS   | Pseudo-F | P(MC) |
| Season                                    | 3   | 0.19 | 0.84     | n.s.  | Season                                  | 3   | 0.06 | 1.19     | n.s.  |
| Size                                      | 1   | 0.12 | 0.51     | n.s.  | Size                                    | 1   | 0.07 | 0.15     | n.s.  |
| Sea×Size                                  | 3   | 0.11 | 0.48     | n.s.  | Sea×Size                                | 2   | 0.06 | 1.26     | n.s.  |
| Residuals                                 | 300 | 0.23 |          |       | Residuals                               | 159 | 0.05 |          |       |
| Total                                     | 307 |      |          |       | Total                                   | 165 |      |          |       |

**Supplementary Table S4.** List of the %W of the taxa found seasonally in the stomach contents of specimens of *Solea solea* captured between January and December 2019 in the Central Adriatic Sea for studying their diets.

|                                    | Season |        |        |        |                                 | Season |        |        |        |
|------------------------------------|--------|--------|--------|--------|---------------------------------|--------|--------|--------|--------|
|                                    | Spring | Summer | Autumn | Winter |                                 | Spring | Summer | Autumn | Winter |
| <b>Foraminifera</b>                |        |        |        |        | <b>Sipuncula</b>                |        |        |        |        |
| Elphidium                          | 0.04   | 0.00   | 0.00   | 0.21   | <i>Phascolosoma stephensoni</i> | 10.43  | 0.00   | 2.14   | 0.00   |
| Unid. Foraminifera                 | 0.00   | 0.00   | 0.00   | 0.40   | <i>Sipunculus nudus</i>         | 0.00   | 0.00   | 0.00   | 2.12   |
|                                    |        |        |        |        | Sipunculidae                    | 0.00   | 0.00   | 1.32   | 1.54   |
| <b>Cnidaria</b>                    |        |        |        |        | <b>Arthropoda</b>               |        |        |        |        |
| Hydrozoa                           | 0.00   | 0.00   | 0.00   | 0.07   | <b>Crustacea</b>                |        |        |        |        |
|                                    |        |        |        |        | <b>Decapoda</b>                 |        |        |        |        |
| <b>Platyelminthes</b>              |        |        |        |        | <i>Upogebia tipica</i>          | 0.00   | 15.21  | 0.00   | 0.00   |
| Cestoda                            | 15.36  | 5.26   | 9.64   | 5.52   | <i>Munida sp.</i>               | 0.00   | 0.00   | 0.00   | 0.46   |
|                                    |        |        |        |        | Crangonidae                     | 0.00   | 0.00   | 0.00   | 0.14   |
| <b>Mollusca</b>                    |        |        |        |        | Caridea                         | 0.00   | 0.00   | 1.11   | 0.00   |
| <b>Scaphopoda</b>                  |        |        |        |        | Unid. Decapoda                  | 0.00   | 0.00   | 2.70   | 0.19   |
| <i>Antalis inaequicostata</i>      | 0.00   | 0.00   | 0.00   | 1.57   | <b>Amphipoda</b>                |        |        |        |        |
| <b>Gastropoda</b>                  |        |        |        |        | <i>Leucothoe lilljeborgi</i>    | 0.00   | 0.00   | 0.00   | 0.26   |
| <i>Fusinus rostratus</i>           | 0.00   | 0.00   | 0.00   | 0.13   | <i>Ampelisca sp.</i>            | 0.54   | 7.41   | 10.27  | 5.68   |
| <i>Oxynoe olivacea</i>             | 0.67   | 0.00   | 0.00   | 0.00   | Oedicerotidae                   | 0.00   | 0.00   | 0.00   | 0.14   |
| <i>Turritellinella tricarinata</i> | 0.07   | 2.85   | 0.32   | 0.00   | Gammaridea                      | 0.00   | 0.00   | 0.21   | 0.15   |
| <i>Alvania sp.</i>                 | 0.00   | 0.00   | 1.99   | 0.00   | Unid. Amphipoda                 | 1.03   | 0.00   | 5.24   | 0.99   |
| Unid. Gastropoda                   | 0.00   | 0.16   | 0.00   | 0.00   | <b>Stomatopoda</b>              |        |        |        |        |
| <b>Bivalvia</b>                    |        |        |        |        | <i>Squilla mantis</i>           | 0.75   | 0.00   | 1.03   | 0.00   |
| <i>Peronidia albicans</i>          | 0.00   | 0.19   | 0.00   | 0.00   | <b>Tanaidacea</b>               |        |        |        |        |
| <i>Petricola pholadiformis</i>     | 0.00   | 0.00   | 0.00   | 0.46   | <i>Apseudopsis latreillii</i>   | 0.00   | 3.90   | 0.00   | 1.90   |
| Corbulidae                         | 0.67   | 0.00   | 0.00   | 0.00   | <i>Apseudes spinosus</i>        | 0.00   | 0.00   | 0.48   | 0.41   |
| Pectinidae                         | 0.22   | 0.47   | 0.00   | 0.00   | Unid. Tanaidacea                | 0.00   | 1.03   | 0.00   | 0.00   |
| Veneridae                          | 2.67   | 0.00   | 1.07   | 3.13   | <b>Unid. Crustacea</b>          | 0.67   | 0.50   | 1.34   | 1.05   |
| <b>Unid. Mollusca</b>              | 8.23   | 7.08   | 18.87  | 26.84  |                                 |        |        |        |        |
|                                    |        |        |        |        | <b>Echinodermata</b>            |        |        |        |        |
| <b>Anellida</b>                    |        |        |        |        | <i>Paracentrotus lividus</i>    | 0.00   | 1.41   | 0.00   | 0.00   |
| <b>Polychaeta</b>                  |        |        |        |        | <i>Holothuria sp.</i>           | 1.33   | 0.00   | 0.00   | 0.00   |
| <i>Lepidasthenia sp.</i>           | 0.00   | 0.00   | 0.00   | 1.23   | Unid. Echinodermata             | 2.49   | 2.92   | 1.51   | 1.84   |
| Leanira                            | 0.00   | 0.00   | 0.00   | 0.35   |                                 |        |        |        |        |
| Aphroditidae                       | 0.61   | 0.00   | 0.00   | 0.00   | <b>Osteichthyes</b>             |        |        |        |        |
| Nereididae                         | 0.00   | 8.26   | 0.00   | 0.40   | Fish fragments                  | 0.45   | 0.00   | 2.37   | 1.39   |
| Phyllodocidae                      | 0.00   | 0.00   | 0.00   | 0.17   | Fish scales                     | 5.41   | 3.97   | 3.41   | 6.52   |
| Glyceriformia                      | 0.00   | 0.00   | 0.70   | 0.00   | Larvae                          | 11.64  | 5.76   | 0.23   | 5.43   |
| <i>Sternaspis scutata</i>          | 0.00   | 0.00   | 3.89   | 0.00   |                                 |        |        |        |        |
| Terebellida                        | 0.00   | 0.00   | 0.33   | 0.00   | <b>Other</b>                    |        |        |        |        |
| Maldanidae                         | 0.00   | 0.00   | 0.00   | 0.20   | Shells                          | 6.28   | 10.36  | 1.50   | 12.68  |
| Sabellidae                         | 5.33   | 0.00   | 0.00   | 0.00   | Vegetal rests                   | 0.42   | 1.26   | 0.48   | 0.39   |
| Spionidae                          | 0.00   | 0.00   | 0.00   | 0.83   | Eggs                            | 0.86   | 0.00   | 0.32   | 2.28   |
| Unid. Polychaeta                   | 22.50  | 22.00  | 22.47  | 10.49  | Sand                            | 0.00   | 0.00   | 5.06   | 2.31   |
|                                    |        |        |        |        | Wood                            | 0.00   | 0.00   | 0.00   | 0.18   |
|                                    |        |        |        |        | Unidentified material           | 1.33   | 0.00   | 0.00   | 0.00   |

**Supplementary Table S5.** Results of multivariate PERMANOVA main and pairwise tests carried out for the factors “Season” and “Size” on the results obtained with SCA (%W) carried out on specimens of *Solea solea* captured between January and December 2019 in the Central Adriatic Sea for studying their diets. Pairwise comparisons are conducted on the term “Season” and on the term “Size”. Only comparisons between pairs of consecutive seasons are showed. M= medium-size specimens; L= large-size specimens; df=degrees of freedom; MS= mean square; Pseudo-F= statistic F; t=statistic t for pairwise comparisons; Unique perms= number of permutations; p(MC)= probability level after Monte Carlo test; \*=p ≤0.05; \*\*=p ≤ 0.01; \*\*\*=p ≤ 0.001; n.s. = not significant.

| Diet composition (%W)                                  |     |        |          |       |                                                                              |      |              |       |
|--------------------------------------------------------|-----|--------|----------|-------|------------------------------------------------------------------------------|------|--------------|-------|
| Main test for diet composition of <i>S. solea</i> (%W) |     |        |          |       | Pair-wise comparison for factor "Sea×Size" within level 'M' of factor 'Size' |      |              |       |
| Source                                                 | df  | MS     | Pseudo-F | P(MC) | Groups                                                                       | t    | Unique perms | p(MC) |
| Season                                                 | 3   | 4545.3 | 5.70     | ***   | Spring vs summer                                                             | 1.91 | 9949         | **    |
| Size                                                   | 1   | 5848.5 | 7.34     | ***   | Summer vs autumn                                                             | 2.01 | 9942         | **    |
| Sea×Size                                               | 3   | 1299   | 1.63     | n.s.  | Autumn vs winter                                                             | 3.00 | 9951         | ***   |
| Residuals                                              | 355 | 797.18 |          |       | Winter vs spring                                                             | 2.23 | 9941         | ***   |
| Total                                                  | 362 |        |          |       | Pair-wise comparison for factor "Sea×Size" within level 'L' of factor 'Size' |      |              |       |
|                                                        |     |        |          |       | Groups                                                                       | t    | Unique perms | p(MC) |
|                                                        |     |        |          |       | Spring vs summer                                                             | 0.59 | 9933         | n.s.  |
|                                                        |     |        |          |       | Summer vs autumn                                                             | 1.11 | 9930         | n.s.  |
|                                                        |     |        |          |       | Autumn vs winter                                                             | 2.09 | 9930         | ***   |
|                                                        |     |        |          |       | Winter vs spring                                                             | 1.56 | 9923         | *     |
|                                                        |     |        |          |       | Pair-wise comparison for factor "Sea×Size" within levels of factor 'Size'    |      |              |       |
|                                                        |     |        |          |       | Groups                                                                       | t    | Unique perms | p(MC) |
|                                                        |     |        |          |       | M vs L in spring                                                             | 2.56 | 9945         | ***   |
|                                                        |     |        |          |       | M vs L in summer                                                             | 2.25 | 9944         | n.s.  |
|                                                        |     |        |          |       | M vs L in autumn                                                             | 1.14 | 9955         | n.s.  |
|                                                        |     |        |          |       | M vs L in winter                                                             | 0.85 | 9945         | ***   |

**Supplementary Table S6.** Output of SIMPER analysis conducted on the diet composition (%W) of *Solea solea* within each season both considering overall results and differences in the diets of medium- (M) and large- (L) size specimens. SIMPER analysis was conducted on the Bray-Curtis resemblance matrix of transformed biomass data. Only comparisons between consecutive pairs of seasons are showed. Cut-off for low contribution at 60%. Avg. Ab=average abundance; Avg. Sim=average similarity; Contrib %= percentage of variance explained by the explanatory variables; Cum %= cumulative percentage of variance explained by the explanatory variables.

| OVERALL RESULTS OF DIET COMPOSITION |          |        |           |       |                                |                    |                    |           |       |
|-------------------------------------|----------|--------|-----------|-------|--------------------------------|--------------------|--------------------|-----------|-------|
| Spring                              |          |        |           |       | Spring vs summer               |                    |                    |           |       |
| Average similarity: 21.8 %          |          |        |           |       | Average dissimilarity = 82.2 % |                    |                    |           |       |
| Taxon                               | Av.Abund | Av.Sim | Contrib % | Cum % | Taxon                          | Spring<br>Av.Abund | Summer<br>Av.Abund | Contrib % | Cum % |
| Fish larvae                         | 0.21     | 10.08  | 46.35     | 46.35 | Polychaeta                     | 0.19               | 0.23               | 19.82     | 19.82 |
| Polychaeta                          | 0.19     | 5.36   | 24.64     | 71    | Fish larvae                    | 0.21               | 0.12               | 17.72     | 37.53 |
| Summer                              |          |        |           |       | Shells                         | 0.1                | 0.15               | 13.07     | 50.61 |
| Average similarity: 16.5 %          |          |        |           |       | Fish scales                    | 0.12               | 0.08               | 12.73     | 63.33 |
| Taxon                               | Av.Abund | Av.Sim | Contrib % | Cum % | Summer vs autumn               |                    |                    |           |       |
| Polychaeta                          | 0.23     | 6.22   | 37.64     | 37.64 | Average dissimilarity = 85.6 % |                    |                    |           |       |
| Fish larvae                         | 0.12     | 3.11   | 18.84     | 56.48 | Summer                         | Autumn             |                    |           |       |
| Shells                              | 0.15     | 2.75   | 16.62     | 73.09 | Taxon                          | Av.Abund           | Av.Abund           | Contrib % | Cum % |
| Autumn                              |          |        |           |       | Polychaeta                     | 0.11               | 0.26               | 18.3      | 18.3  |
| Average similarity: 18.3 %          |          |        |           |       | Fish scales                    | 0.18               | 0.08               | 13.11     | 31.41 |
| Taxon                               | Av.Abund | Av.Sim | Contrib % | Cum % | <i>Ampelisca</i> sp.           | 0.09               | 0.13               | 10.94     | 42.35 |
| Polychaeta                          | 0.26     | 12.54  | 68.56     | 68.56 | Fish larvae                    | 0.15               | 0.01               | 9.81      | 52.16 |
| Winter                              |          |        |           |       | Mollusca                       | 0.08               | 0.07               | 7.04      | 59.2  |
| Average similarity: 16.1 %          |          |        |           |       | Amphipoda                      | 0.04               | 0.04               | 4.93      | 64.13 |
| Taxon                               | Av.Abund | Av.Sim | Contrib % | Cum % | Autumn vs winter               |                    |                    |           |       |
|                                     |          |        |           |       | Average dissimilarity = 88.9 % |                    |                    |           |       |
|                                     |          |        |           |       | Autumn                         | Winter             |                    |           |       |

|                            |          |        |           |       |
|----------------------------|----------|--------|-----------|-------|
| Fish scales                | 0.18     | 6.84   | 42.58     | 42.58 |
| Fish larvae                | 0.15     | 4.37   | 27.17     | 69.75 |
| <b>Medium size</b>         |          |        |           |       |
| Average similarity: 19.2 % |          |        |           |       |
| Taxon                      | Av.Abund | Av.Sim | Contrib % | Cum % |
| Fish larvae                | 0.18     | 7.07   | 36.85     | 36.85 |
| Polychaeta                 | 0.18     | 4.69   | 24.43     | 61.27 |
| <b>Large size</b>          |          |        |           |       |
| Average similarity: 11.5 % |          |        |           |       |
| Taxon                      | Av.Abund | Av.Sim | Contrib % | Cum % |
| Polychaeta                 | 0.2      | 5.93   | 51.73     | 51.73 |
| Fish scales                | 0.1      | 2.44   | 21.25     | 72.98 |

|                      |          |          |           |       |
|----------------------|----------|----------|-----------|-------|
| Taxon                | Av.Abund | Av.Abund | Contrib % | Cum % |
| Polychaeta           | 0.11     | 0.26     | 18.3      | 18.3  |
| Fish scales          | 0.18     | 0.08     | 13.11     | 31.41 |
| <i>Ampelisca</i> sp. | 0.09     | 0.13     | 10.94     | 42.35 |
| Fish larvae          | 0.15     | 0.01     | 9.81      | 52.16 |
| Mollusca             | 0.08     | 0.07     | 7.04      | 59.2  |
| Amphipoda            | 0.04     | 0.04     | 4.93      | 64.13 |

|                                |                    |                    |           |       |
|--------------------------------|--------------------|--------------------|-----------|-------|
| <b>Winter vs spring</b>        |                    |                    |           |       |
| Average dissimilarity = 83.4 % |                    |                    |           |       |
| Taxon                          | Winter<br>Av.Abund | Spring<br>Av.Abund | Contrib % | Cum % |
| Fish larvae                    | 0.15               | 0.21               | 17.15     | 17.15 |
| Polychaeta                     | 0.11               | 0.19               | 15.45     | 32.59 |
| Fish scales                    | 0.18               | 0.12               | 15.13     | 47.72 |
| Shells                         | 0.05               | 0.1                | 8.37      | 56.09 |
| <i>Ampelisca</i> sp.           | 0.09               | 0.02               | 6.64      | 62.74 |

| **DIET COMPOSITION OF MEDIUM- AND LARGE-SIZE SPECIMENS** |  |  |  |  |
| **M vs L in spring** |  |  |  |  |
| Average dissimilarity = 89.3 % |  |  |  |  |
| Taxon | M Av.Abund | L Av.Abund | Contrib % | Cum % |
| Polychaeta | 0,16 | 0,31 | 24,32 | 24,32 |
| Fish larvae | 0,25 | 0,02 | 17,47 | 41,78 |
| Fish scales | 0,12 | 0,14 | 14,83 | 56,61 |
| Shells | 0,09 | 0,13 | 12,01 | 68,62 |

|                                |               |               |           |       |
|--------------------------------|---------------|---------------|-----------|-------|
| <b>M vs L in summer</b>        |               |               |           |       |
| Average dissimilarity = 85.7 % |               |               |           |       |
| Taxon                          | M<br>Av.Abund | L<br>Av.Abund | Contrib % | Cum % |
| Polychaeta                     | 0,21          | 0,26          | 20,25     | 20,25 |
| Shells                         | 0,15          | 0,14          | 14,14     | 34,39 |
| Fish larvae                    | 0,16          | 0,03          | 12,59     | 46,98 |
| <i>Ampelisca</i> sp.           | 0,15          | 0,07          | 9,82      | 56,80 |
| Fish scales                    | 0,10          | 0,04          | 9,28      | 66,08 |

| M vs L in autumn               |               |               |           |       |
|--------------------------------|---------------|---------------|-----------|-------|
| Average dissimilarity = 81.1 % |               |               |           |       |
| Taxon                          | M<br>Av.Abund | L<br>Av.Abund | Contrib % | Cum % |
| Polychaeta                     | 0,26          | 0,27          | 23,49     | 23,49 |
| <i>Ampelisca</i> sp.           | 0,15          | 0,11          | 14,29     | 37,78 |
| Fish scales                    | 0,10          | 0,04          | 9,98      | 47,77 |
| Mollusca                       | 0,10          | 0,03          | 7,59      | 55,35 |
| Fish fragments                 | 0,04          | 0,08          | 7,11      | 62,46 |

| M vs L in winter               |               |               |           |       |
|--------------------------------|---------------|---------------|-----------|-------|
| Average dissimilarity = 87.9 % |               |               |           |       |
| Taxon                          | M<br>Av.Abund | L<br>Av.Abund | Contrib % | Cum % |
| Fish scales                    | 0,20          | 0,14          | 14,54     | 14,54 |
| Fish larvae                    | 0,21          | 0,02          | 14,46     | 29,00 |
| Polychaeta                     | 0,14          | 0,06          | 9,44      | 38,43 |
| Fish eggs                      | 0,03          | 0,12          | 9,09      | 47,52 |
| <i>Ampelisca</i> sp.           | 0,12          | 0,04          | 8,29      | 55,81 |
| Mollusca                       | 0,07          | 0,10          | 7,18      | 63,00 |

**Supplementary Table S7.** Values of seasonal diet diversity observed in n=477 specimens of *Solea solea* captured in the Central Adriatic Sea between January and December 2019 for studying their diets. s.d. = standard deviation.

| Season | Diet diversity<br>(H') |      |
|--------|------------------------|------|
|        | mean                   | s.d. |
| Spring | 0.45                   | 0.48 |
| Summer | 0.45                   | 0.55 |
| Autumn | 0.38                   | 0.42 |
| Winter | 0.59                   | 0.51 |

**Supplementary Table S8.** Results of univariate PERMANOVA main and pairwise tests carried out for the factors “Season” and ‘Size’ on the  $\delta^{13}\text{C}$ ,  $\delta^{15}\text{N}$  and C:N values of n=68 specimens of *Solea solea* captured in the Central Adriatic Sea between January and December 2019 for studying their diets. Pairwise comparisons are conducted on the term “Season” for pairs of level of factor “Season”. Only comparisons between pairs of consecutive seasons are showed. M= medium-size specimens; L= large-size specimens; df=degrees of freedom; MS= mean square; Pseudo-F= statistic F; t=statistic t for pairwise comparisons; Unique perms= number of permutations; p(MC)= probability level after Monte Carlo test; \*= $p \leq 0.05$ ; \*\*= $p \leq 0.01$ ; \*\*\*= $p \leq 0.001$ ; n.s. = not significant.

| $\delta^{15}\text{N}$ and $\delta^{13}\text{C}$ |     |      |          |       |                                                                |      |              |       |
|-------------------------------------------------|-----|------|----------|-------|----------------------------------------------------------------|------|--------------|-------|
| Main test for $\delta^{13}\text{C}$             |     |      |          |       | Pair-wise comparison within pairs of levels of factor 'Season' |      |              |       |
| Source                                          | df  | MS   | Pseudo-F | P(MC) | Groups                                                         | t    | Unique perms | P(MC) |
| Season                                          | 3   | 1.68 | 3.1      | *     | Spring vs summer                                               | 0.93 | 9947         | n.s.  |
| Size                                            | 1   | 2.68 | 4.9      | *     | Summer vs autumn                                               | 0.27 | 9950         | n.s.  |
| Sea×Size                                        | 3   | 0.53 | 1.0      | n.s.  | Autumn vs winter                                               | 2.64 | 9948         | **    |
| Residuals                                       | 60  | 0.55 |          |       | Winter vs spring                                               | 2.02 | 9954         | *     |
| Total                                           | 67  |      |          |       |                                                                |      |              |       |
|                                                 |     |      |          |       | Pair-wise comparison within pairs of levels of factor 'Size'   |      |              |       |
|                                                 |     |      |          |       | Groups                                                         | t    | Unique perms | P(MC) |
|                                                 |     |      |          |       | M vs. L                                                        | 2.21 | 9954         | *     |
| $\delta^{15}\text{N}$                           |     |      |          |       |                                                                |      |              |       |
| Main test for $\delta^{15}\text{N}$             |     |      |          |       | Pair-wise comparison within pairs of levels of factor 'Season' |      |              |       |
| Source                                          | df  | MS   | Pseudo-F | P(MC) | Groups                                                         | t    | Unique perms | P(MC) |
| Season                                          | 3   | 1.47 | 4.84     | *     | Spring vs summer                                               | 0.0  | 9849         | n.s.  |
| Size                                            | 1   | 0.17 | 0.56     | n.s.  | Summer vs autumn                                               | 0.2  | 9850         | n.s.  |
| Sea×Size                                        | 3   | 0.14 | 0.47     | n.s.  | Autumn vs winter                                               | 3.5  | 9853         | **    |
| Residuals                                       | 60  | 0.30 |          |       | Winter vs spring                                               | 2.7  | 9840         | *     |
| Total                                           | 67  |      |          |       |                                                                |      |              |       |
| $\delta^{13}\text{C}$                           |     |      |          |       |                                                                |      |              |       |
| Main test for $\delta^{13}\text{C}$             |     |      |          |       |                                                                |      |              |       |
| Source                                          | df  | MS   | Pseudo-F | P(MC) |                                                                |      |              |       |
| Season                                          | 3.0 | 0.20 | 0.8      | n.s.  |                                                                |      |              |       |

|                   |           |           |                 |              |
|-------------------|-----------|-----------|-----------------|--------------|
| Size              | 1.0       | 2.51      | 1.0             | **           |
| Sea×Size          | 3.0       | 0.39      | 1.6             | n.s.         |
| Residuals         | 60.0      | 0.24      |                 |              |
| Total             | 67.0      |           |                 |              |
| C:N               |           |           |                 |              |
| Main test for C:N |           |           |                 |              |
| <b>Source</b>     | <b>df</b> | <b>MS</b> | <b>Pseudo-F</b> | <b>P(MC)</b> |
| Season            | 3         | 0.04      | 1.1             | n.s.         |
| Size              | 1         | 0.09      | 2.7             | n.s.         |
| Sea×Size          | 3         | 0.01      | 0.3             | n.s.         |
| Residuals         | 60        | 0.03      |                 |              |
| Total             | 67        |           |                 |              |

**Supplementary Table S9.** Seasonal proportional contribution of each food source to the diet of n=477 specimens of *Solea solea* captured in the Cetral Adriatic Sea between January and December 2019 for studying their diets. SD= standard deviation.

| Season        | Proportional contribute |      |             |      |                      |      |             |      |              |      |
|---------------|-------------------------|------|-------------|------|----------------------|------|-------------|------|--------------|------|
|               | Pelagic fish            |      | Nephtyidae  |      | <i>Ampelisca</i> sp. |      | Fish larvae |      | Cucumariidae |      |
|               | mean                    | SD   | mean        | SD   | mean                 | SD   | mean        | SD   | mean         | SD   |
| <b>Spring</b> | 0.23                    | 0.13 | <b>0.40</b> | 0.11 | 0.11                 | 0.07 | 0.09        | 0.06 | 0.18         | 0.07 |
| <b>Summer</b> | 0.22                    | 0.08 | <b>0.38</b> | 0.09 | 0.17                 | 0.08 | 0.08        | 0.05 | 0.15         | 0.06 |
| <b>Autumn</b> | <b>0.33</b>             | 0.07 | 0.28        | 0.08 | 0.24                 | 0.07 | 0.05        | 0.04 | 0.10         | 0.05 |
| <b>Winter</b> | 0.31                    | 0.12 | <b>0.48</b> | 0.09 | 0.07                 | 0.04 | 0.05        | 0.03 | 0.10         | 0.04 |

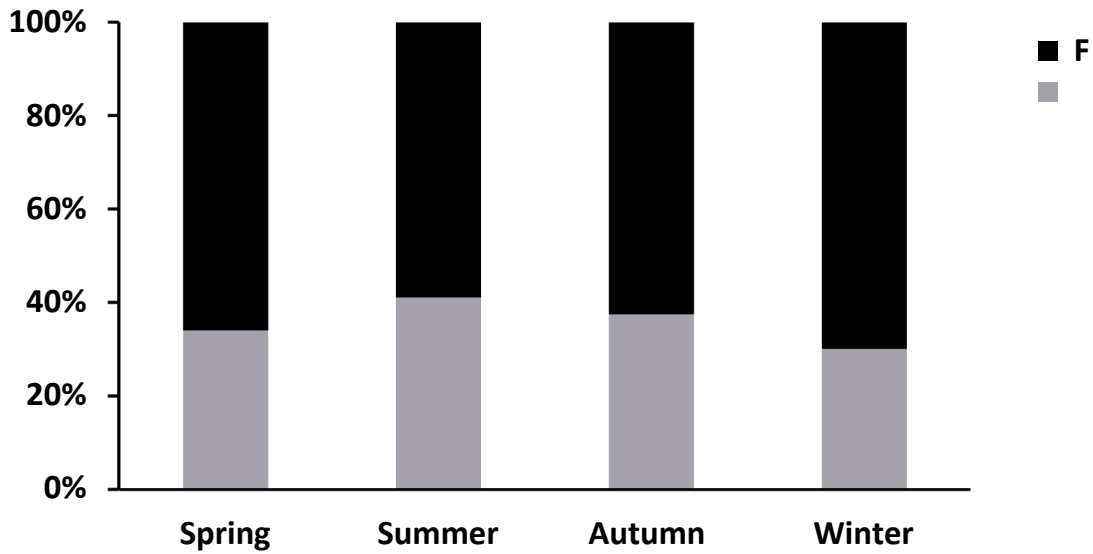

**Supplementary Figure S1.** Seasonal percentage of female and male specimens of *Solea solea* (n=477) captured in the Central Adriatic Sea between January and December 2019.

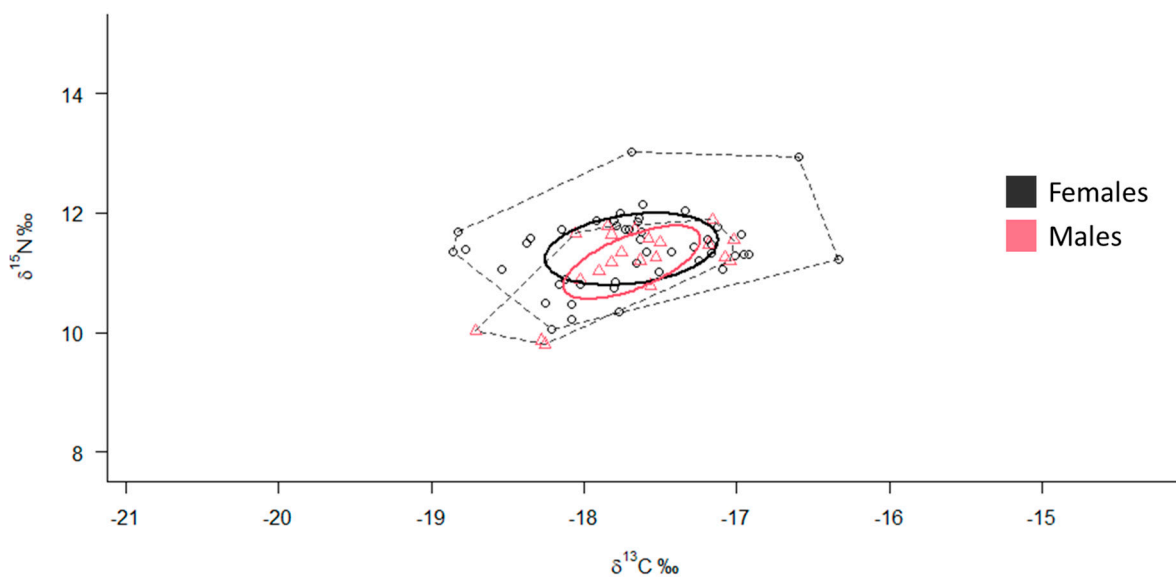

**Supplementary Figure S2.**  $\delta^{13}\text{C}$  -  $\delta^{15}\text{N}$  scatterplot with standard ellipses corrected for small sample size population (SEAC) overlaid for male (n=20) and female (n=48) specimens of *Solea solea* captured in the Central Adriatic Sea between January and December 2019 (p interval=0.4).
